# Supplementary material
Source: HighWire-hosted journal article supplement (http://jpet.aspetjournals.org/highwire/filestream/136712/field_highwire_adjunct_files/0/Supplemental_234153.pdf)

## **Supplemental Data**

### **Endothelium-dependent contractions of isolated arteries to thymoquinone require biased activity of sGC with subsequent cIMP production**

Charlotte M. Detremmerie, Zhengju Chen, Zhuoming Li, Khalid M. Alkharfy, Susan W.S. Leung, Aimin Xu, Yuansheng Gao, Paul M. Vanhoutte

Journal:

THE JOURNAL OF PHARMACOLOGY AND EXPERIMENTAL THERAPEUTICS (JPET)

Legends:

**Supplementary Table 1 – Parameters for UPLC-MS/MS measurement of cyclic nucleotides in isolated arteries**

Protonated mass, quantifier, qualifier [in mass to charge ratio (m/z)], quantifier/qualifier ratio and retention times (in minutes) are given for measurement of cyclic AMP, cyclic GMP, cyclic IMP and the internal standard, tenofovir.

**Supplementary Table 2 – Effect of L-NAME or ODQ on relaxation phase of response to thymoquinone in isolated arteries**

Effect of L-NAME/ODQ on the relaxation phase of the response to thymoquinone in isolated rat aortae (n=4), mesenteric arteries (n=4) and porcine coronary arteries (n=5) with endothelium precontracted with serotonin (porcine arteries,  $10^{-8}$  -  $10^{-5}$  mol/L) or with phenylephrine (rat arteries,  $10^{-8}$  -  $10^{-6}$  mol/L). Data are presented as maximal relaxation [as % of the reference contraction to KCl (60 mmol/L)] to  $10^{-3}$  mol/L thymoquinone in rat arteries and  $10^{-4}$  mol/L thymoquinone in porcine coronary arteries. Data shown as means  $\pm$  standard error of the mean; n represents the number of rings of different animals (i.e. individual observations).

**Supplementary Figure 1 - Tracings of isometric tension recordings in isolated arteries**

Tracings of isometric tension recording in isolated rat aortae (A), rat mesenteric arteries (B) and porcine coronary arteries (C) with endothelium. The arteries were exposed to 60 mmol/L KCl prior to precontraction to phenylephrine ( $3 \times 10^{-7}$  mol/L in rat aortae and  $10^{-6}$  mol/L in rat mesenteric arteries) or serotonin ( $10^{-6}$  mol/L, porcine coronary arteries) and exposure to thymoquinone ( $3 \times 10^{-5}$  mol/L in rat arteries and  $10^{-5}$  M in porcine coronary arteries).

**Supplementary Figure 2 - Effect of COX inhibitors, NADPH oxidase inhibitors and endothelin-receptor antagonists on the response to thymoquinone in isolated arteries**

**(A-B)** Effects of indomethacin ( $10^{-5}$  mol/L), apocynin ( $10^{-4}$  mol/L) and bosentan ( $10^{-6}$  mol/L) on thymoquinone-induced augmentations in rings with endothelium of rat aortae (n=4-5, **A**) and of porcine coronary arteries (n=4-5, **B**), contracted with phenylephrine (rat arteries,  $10^{-8}$  -  $10^{-6}$  mol/L) or with serotonin (porcine arteries,  $10^{-8}$  -  $10^{-5}$  mol/L). In all graphs, the control group includes untreated preparations with endothelium.

The augmentations are shown as areas under curve of the contraction phase of the corresponding concentration-response graphs. Data shown as means  $\pm$  standard error of the mean; n represents the number of rings of different animals (i.e. individual observations). “\*” indicates statistically significant differences from controls ( $P \leq 0.05$ ).

### **Supplementary Figure 3 - Effect of sGC-products/product analogues or protein kinase inhibitors on the response to thymoquinone in isolated arteries**

**(A)** Effect of ODQ ( $10^{-5}$  mol/L), 8-Br-cGMP ( $10^{-5}$  M, in rings treated with ODQ) and PPI ( $10^{-5}$  M, in rings treated with ODQ) in porcine coronary arteries (n=4-9) with endothelium precontracted with serotonin ( $10^{-8}$  -  $10^{-5}$  mol/L) on thymoquinone ( $3 \times 10^{-5}$  mol/L)-induced augmentations.

**(B)** Effect of KT-5720 ( $3 \times 10^{-7}$  mol/L) and KT-5823 ( $10^{-6}$  mol/L) in rat aortae (n=4-8) with endothelium precontracted with phenylephrine ( $10^{-8}$  -  $10^{-6}$  mol/L) on thymoquinone ( $10^{-5}$  mol/L)-induced augmentations. In all graphs, the control group includes untreated preparations with endothelium.

Contractions are expressed as percentage of the precontraction to serotonin in porcine coronary arteries (**A**) or as percentage of the reference contraction to KCl (60 mmol/L) in rat arteries (**B**). Data shown as means  $\pm$  standard error of the mean; n represents the number of rings of different animals (i.e. individual observations). “\*” indicates statistically significant differences from controls ( $P \leq 0.05$ ).

### **Supplementary Figure 4 - Effect of thymoquinone on cyclic GMP levels in isolated porcine coronary arteries**

Effect of  $3 \times 10^{-5}$  mol/L thymoquinone on intracellular cyclic GMP levels in isolated porcine coronary

arteries (n=3) with endothelium precontracted with serotonin ( $10^{-8}$  -  $10^{-5}$  mol/L).

The results are presented as a ratio of the cyclic GMP level in pmoles to the dry weight of the respective samples. Data shown as means  $\pm$  standard error of the mean; n represents the number of rings of different animals (i.e. individual observations).

**Supplementary Figure 5 - Effect of thymoquinone on intracellular cyclic nucleotide levels in isolated porcine coronary arteries**

**(A-B)** Effect of thymoquinone ( $3 \times 10^{-6}$  –  $3 \times 10^{-5}$  mol/L) on the intracellular levels of cyclic GMP **(A)** and cyclic AMP **(B)** in isolated porcine coronary arteries (n=4-5) with endothelium precontracted with serotonin ( $10^{-8}$  -  $10^{-5}$  mol/L) and treated with or without  $3 \times 10^{-5}$  M ODQ.

Data shown as concentration in pmol per mg protein tissue and presented as means  $\pm$  standard error of the mean; n represents the number of experiments for which at least 4 rings were pooled from 4 different animals (i.e. pooled observations). “\*” indicates statistically significant differences from the control group with endothelium ( $P \leq 0.05$ ).

Supplementary Table 1 - Parameters for UPLC-MS/MS measurement of cyclic nucleotides in isolated arteries

| Parameters                 | cAMP | cGMP | cIMP | Tenofovir |
|----------------------------|------|------|------|-----------|
| [M+H] <sup>+</sup> (m/z)   | 330  | 346  | 331  | 288       |
| Quantifier (m/z)           | 136  | 152  | 137  | 176       |
| Qualifier (m/z)            | 119  | 135  | 110  | 270       |
| Quantifier/qualifier ratio | 16.7 | 27.7 | 55.6 | 4.08      |
| Retention Time (min)       | 3.68 | 2.39 | 2.64 | 2.36      |

Supplementary Table 2 – Effect of L-NAME or ODQ on relaxation phase of response to thymoquinone in isolated arteries with endothelium

| <b>Species/Vascular bed</b>         | <b>Control (%)</b> | <b>L-NAME 10<sup>-4</sup> M (%)</b> | <b>ODQ 10<sup>-5</sup> M (%)</b> |
|-------------------------------------|--------------------|-------------------------------------|----------------------------------|
| <b>Rat aorta (n=6)</b>              | -66.1+/-19.8       | -75.9+/-11.2                        | -63.2+/-9.1                      |
| <b>Rat mesenteric artery (n=4)</b>  | -87.2+/-15.5       | -93.1+/-10.7                        | -90.8+/-5.1                      |
| <b>Porcine coronary artery (=6)</b> | -70.5+/-36.8       | -92.1+/-12.1                        | -90.8+/-13.8                     |

Results presented as maximal relaxation calculated as % of reference contraction to 60 mM KCl

Supplementary Figure 1 – Tracings of isometric tension recording in isolated arteries

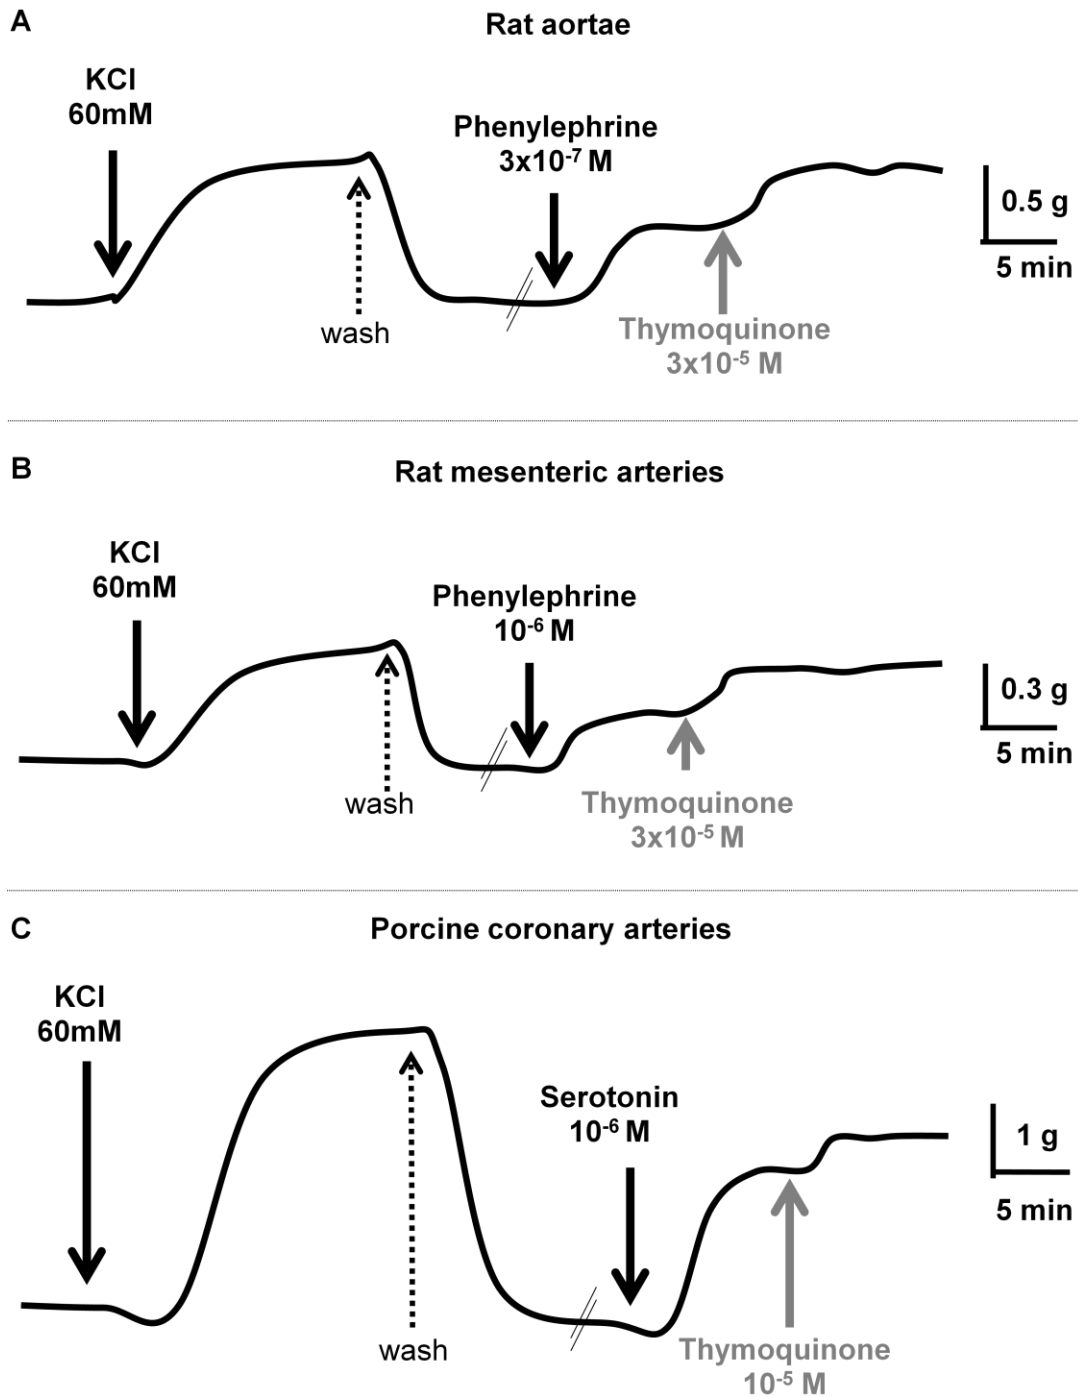

Supplementary Figure 2 – Effect of COX inhibitors, NADPH oxidase inhibitors and endothelin-receptor antagonists on the response to thymoquinone in isolated arteries

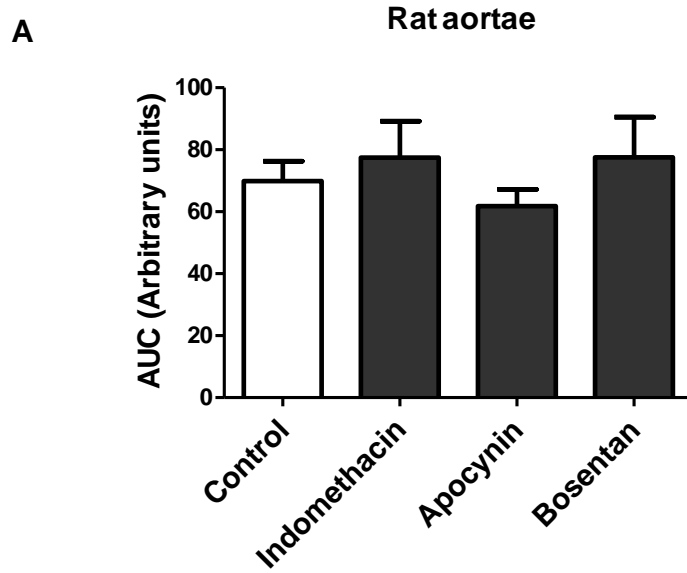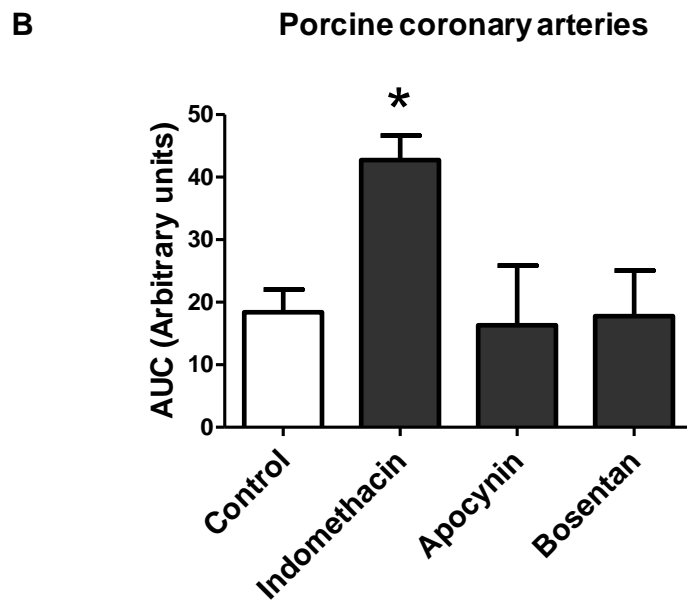



Supplementary Figure 3 – Effect of sGC-products/product analogues or protein kinase inhibitors on the response to thymoquinone in isolated arteries

**A Porcine coronary arteries**

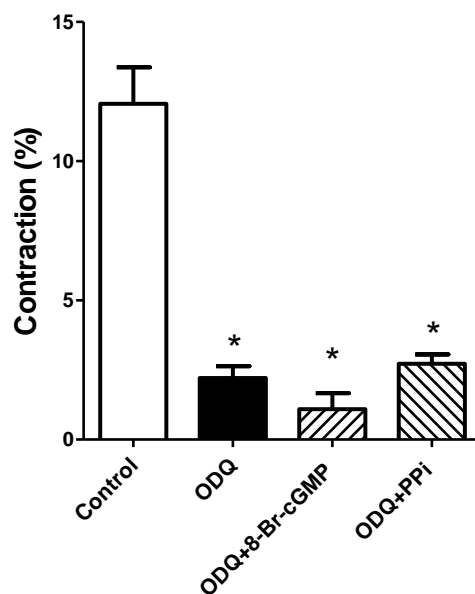

**B Rat aortae**

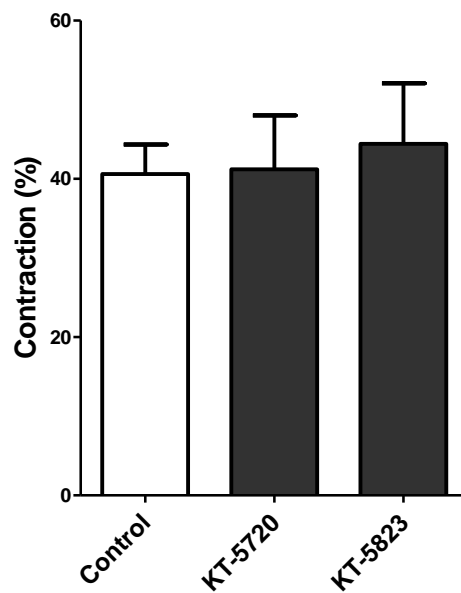

Supplementary Figure 4 – Effect of thymoquinone on cyclic GMP levels  
in isolated porcine coronary arteries

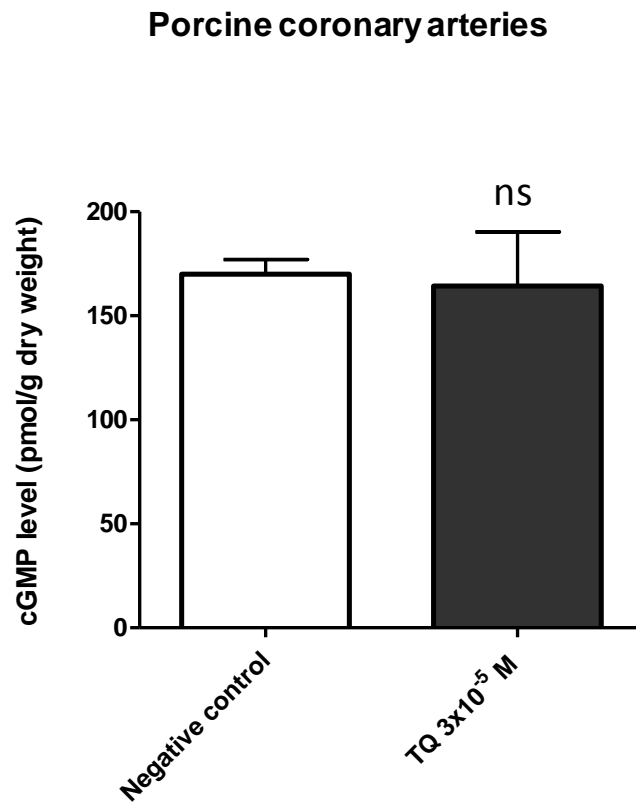

Supplementary Figure 5 – Effect of thymoquinone on intracellular cyclic nucleotide levels in isolated porcine coronary arteries

**Porcine coronary arteries**

■ Without ODQ  
□ With ODQ

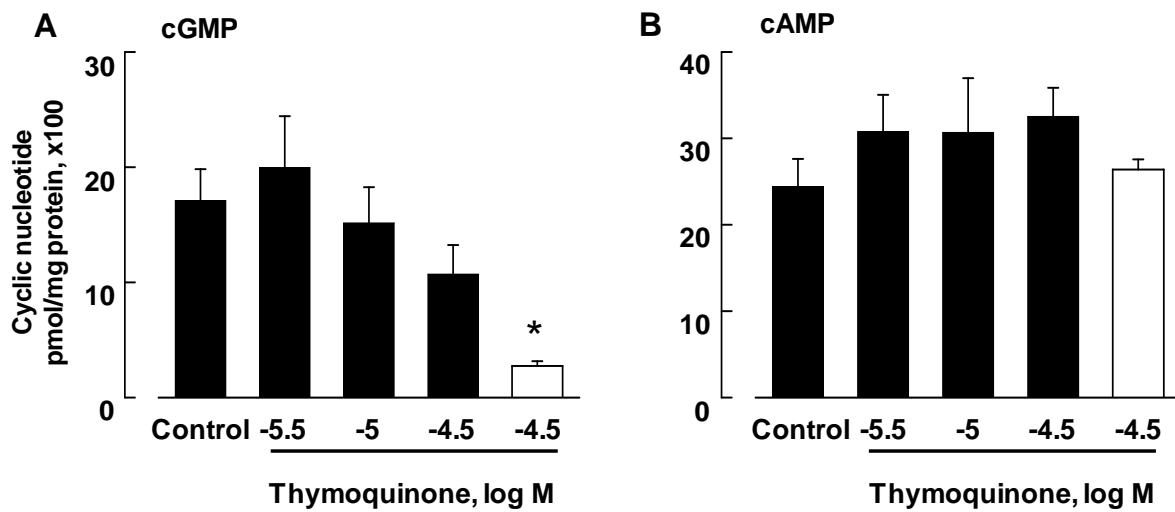

Supplement: Supplemental_234153.pdf [file Supplemental_234153.pdf]
